# Supplementary material
Source: publisher figshare collection journal article supplement (https://springernature.figshare.com/ndownloader/files/22839602)
Supplement: Supplementary file [file 22839602]

# Niche switching and leapfrog foraging: movement ecology of sympatric petrels during the early breeding season

Petra Quillfeldt, Henri Weimerskirch, Karine Delord, Yves Cherel

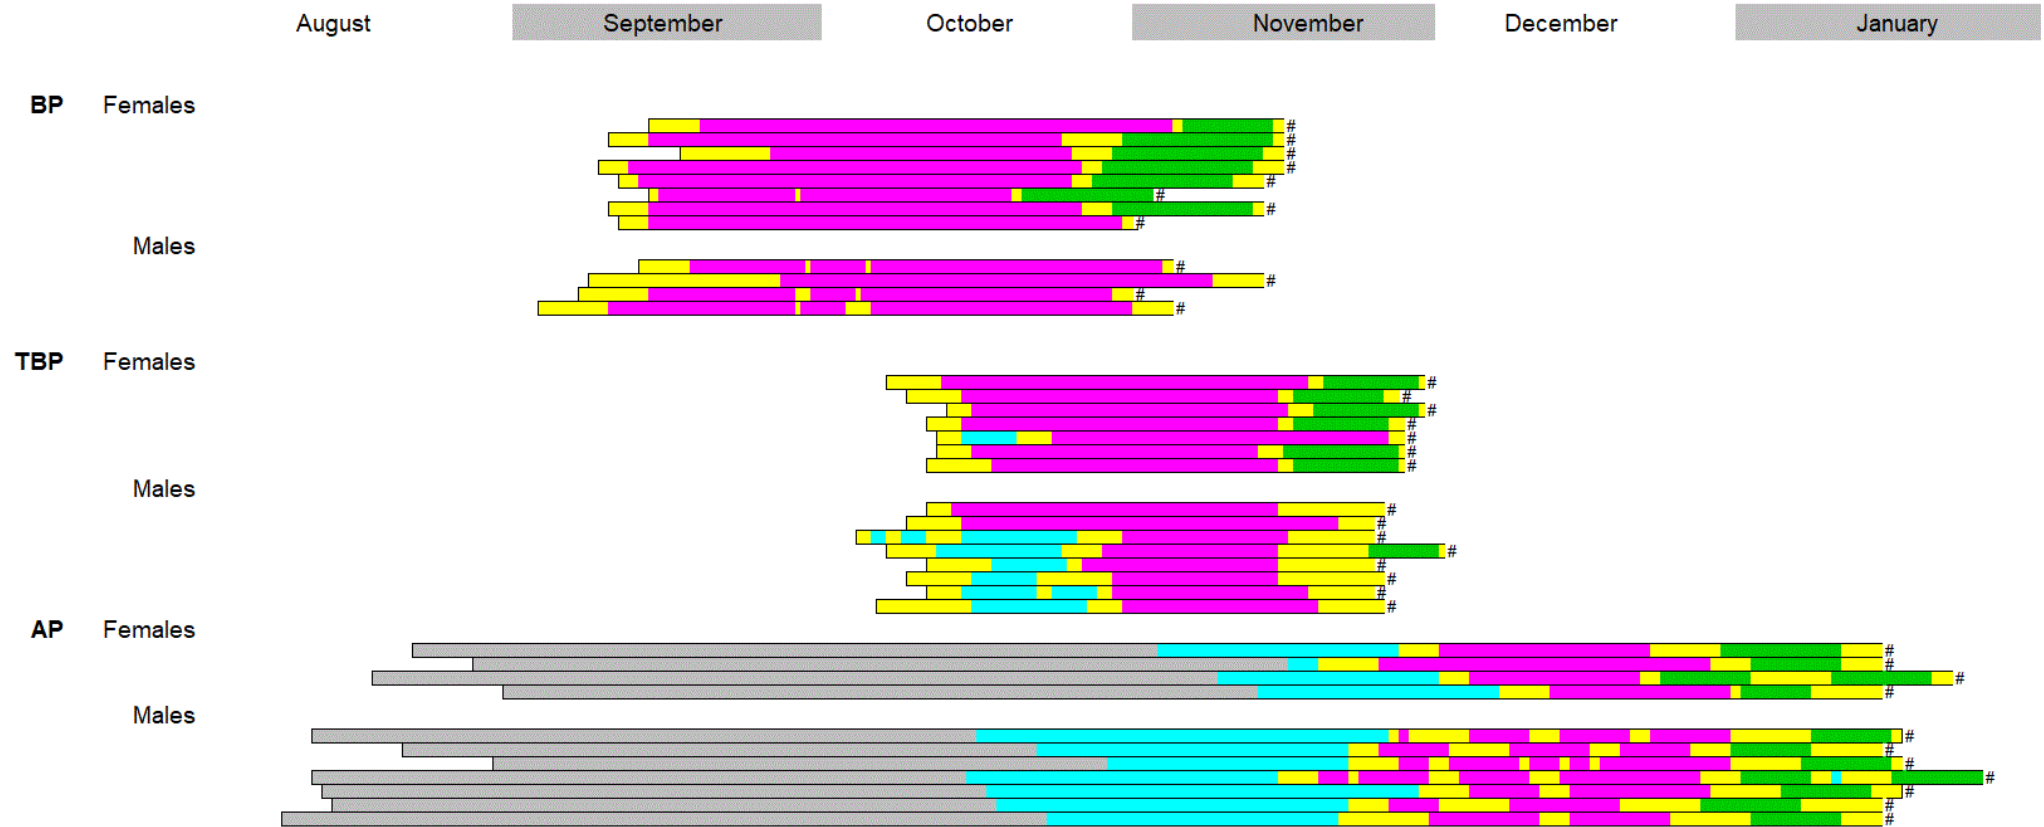

**Fig. S1. Individual early breeding season chronologies of Blue Petrels (BP), Thin-billed prions (TBP) and Antarctic Prions (AP) from Kerguelen Islands.** Color bars show the timing and duration of the subsequent phases from arrival to the colony (first yellow block) until recapture (marked with #). Pre-breeding times at sea are marked in turquoise, and the moult of flight fathers in Antarctic prions is marked in grey. Colony attendance before the pre-laying exodus consisted of shifts of in the burrow (in yellow), followed by the pre-laying exodus (in pink). After return from the pre-laying exodus, the birds spent 1–16 days in the burrow (in yellow), followed by a first foraging trips (marked in green).
